# Supplementary material for: Evaluation of FGFR targeting in breast cancer through interrogation of patient-derived models
Source: Springer Nature journal article supplement (doi:10.1186/s13058-021-01461-4), 2021-08-03

# Supplementary Figure 3

**A**

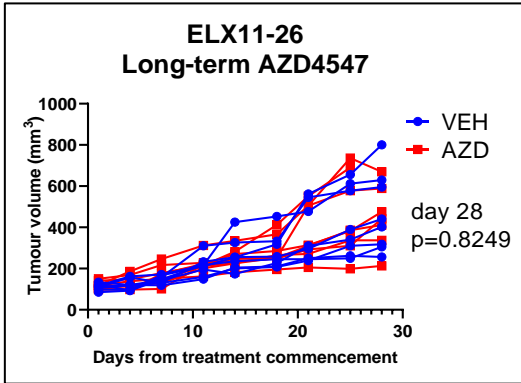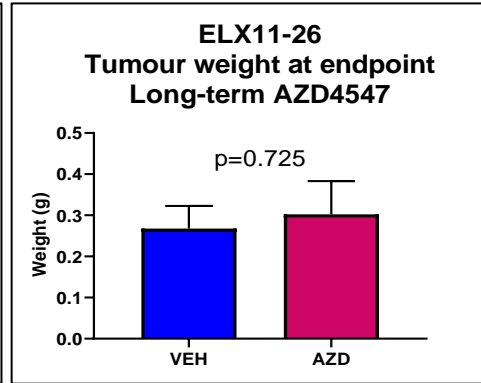

**B**

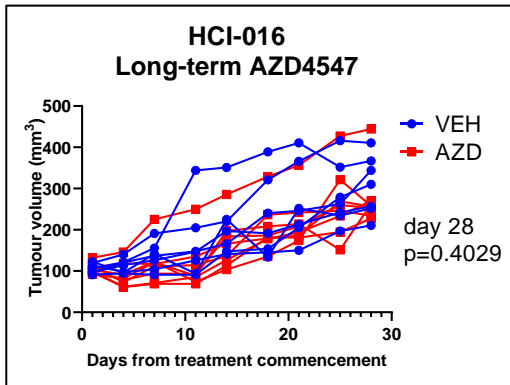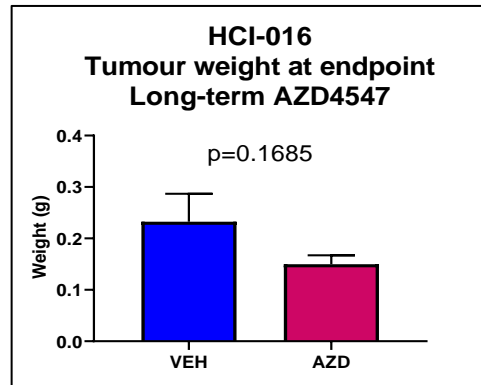

# Supplementary Figure 4

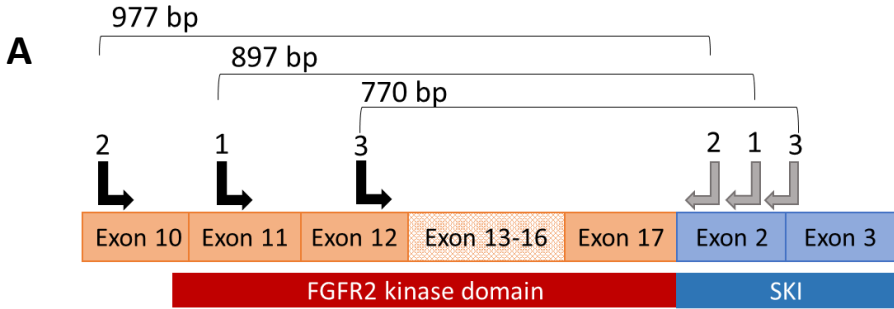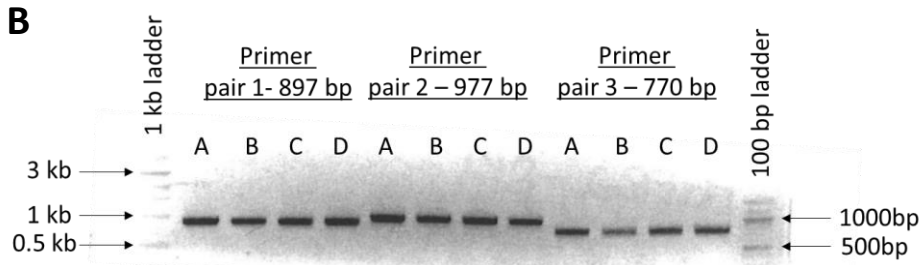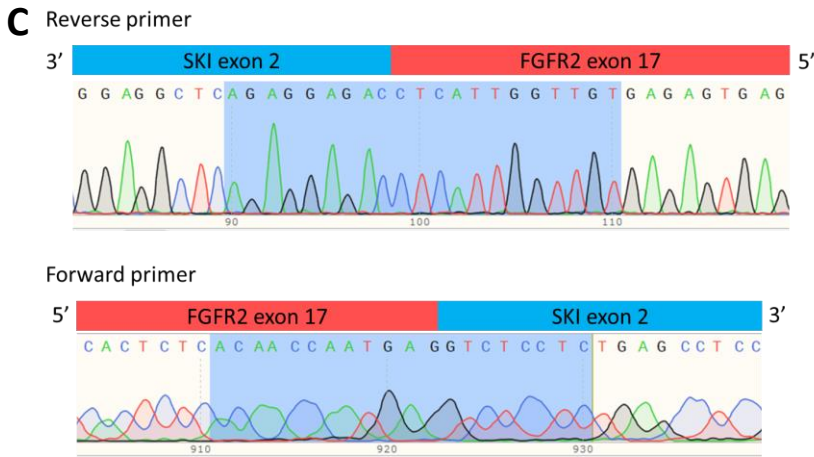

**D** M V S W G R F I C L V V T M A T L S L A R P S F L V E D T T L E P E D A I S S G D D E D D T D G A E D F V S E N S N N K R A P  
 Y W T N T E K M E K R L H A V P A A N T V K F R C P A G G N P M P T M R W L K N G K E F K Q E H R I G G Y K V R N Q H W S  
 L I M E S V V P S D K G N Y T C V V E N E Y G S I N H T Y H L D V V E R S P H R P I L Q A G L P A N A S T V V G G D V E F V C K V  
 Y S D A Q P H I Q W I K H V E K N G S K Y G P D G L P Y L K V L K A A G V N T T D K E I E V L Y I R N V T F E D A G E Y T C L A G  
 N S I G I S F H S A W L T V L P A P G R E K E I T A S P D Y L E I A I Y C I G V F L I A C M V V T V I L C R M K N T T K K P D F S S Q P A  
 V H K L T K R I P L R R Q V T V S A E S S S M N S N T P L V R I T T R L S S T A D T P M L A G V S E Y E L P E D P K W E F P R D K L  
 T L G K P L G E G C F G Q V V M A E A V G I D K D K P K E A V T V A V K M L K D D A T E K D L S D L V S E M E M M K M I G K  
 H K N I I N L L G A C T Q D G P L Y V I V E Y A S K G N L R E Y L R A R R P P G M E Y S Y D I N R V P E E Q M T F K D L V S C T Y Q  
 L A R G M E Y L A S Q K C I H R D L A A R N V L V T E N N V M K I A D F L A R D I N N I D Y Y K T T N G R L P V K W M A P E  
 A L F D R V Y T H Q S D V W S F G V L M W E I F T L G G S P Y P G I P V E E L F K L L K E G H R M D K P A N C T N E L Y M M M  
 R D C W H A V P S Q R P T F K Q L V E D L R I L T L T T N E I S Y V S S E P P A S I R P K T D D T S S Q S P A P S E K D K P S S W L  
 R T L A G S S N K S L G C V H P R Q R L S A F R P W S P A V S A S E K E L S P H L P A L I R D S F Y S Y K S F E T A V A P N V A L A P P  
 A Q Q K V V S S P P C A A A V S R A P E P L A T C T Q P R K R K L T V D T P G A P E T L A P V A A P E E D K D S E A E V E S R E  
 E F T S S L S S P S F T S S S A K D L G S P G A R A L P S A V P D A A A P A D A P S G L E A L E H L R Q A L E G G L D T K E  
 A K E F L H E V V K M R V K Q E E K L S A A L Q A K R S L H Q E L E F L R V A K K E L R E A T E A K R N L R K E I E R L R A E N E  
 K K M K E A N E S R L R L K R E L Q A R Q A R V C D K G C E A G R L R A K Y S A Q I E D L Q V K L Q H A E A D R E Q L R A D L  
 L R E R E A R H L E K V V K E L Q E Q L W P R A R P E A A G S E G A A E L E P

# Supplementary Figure 5

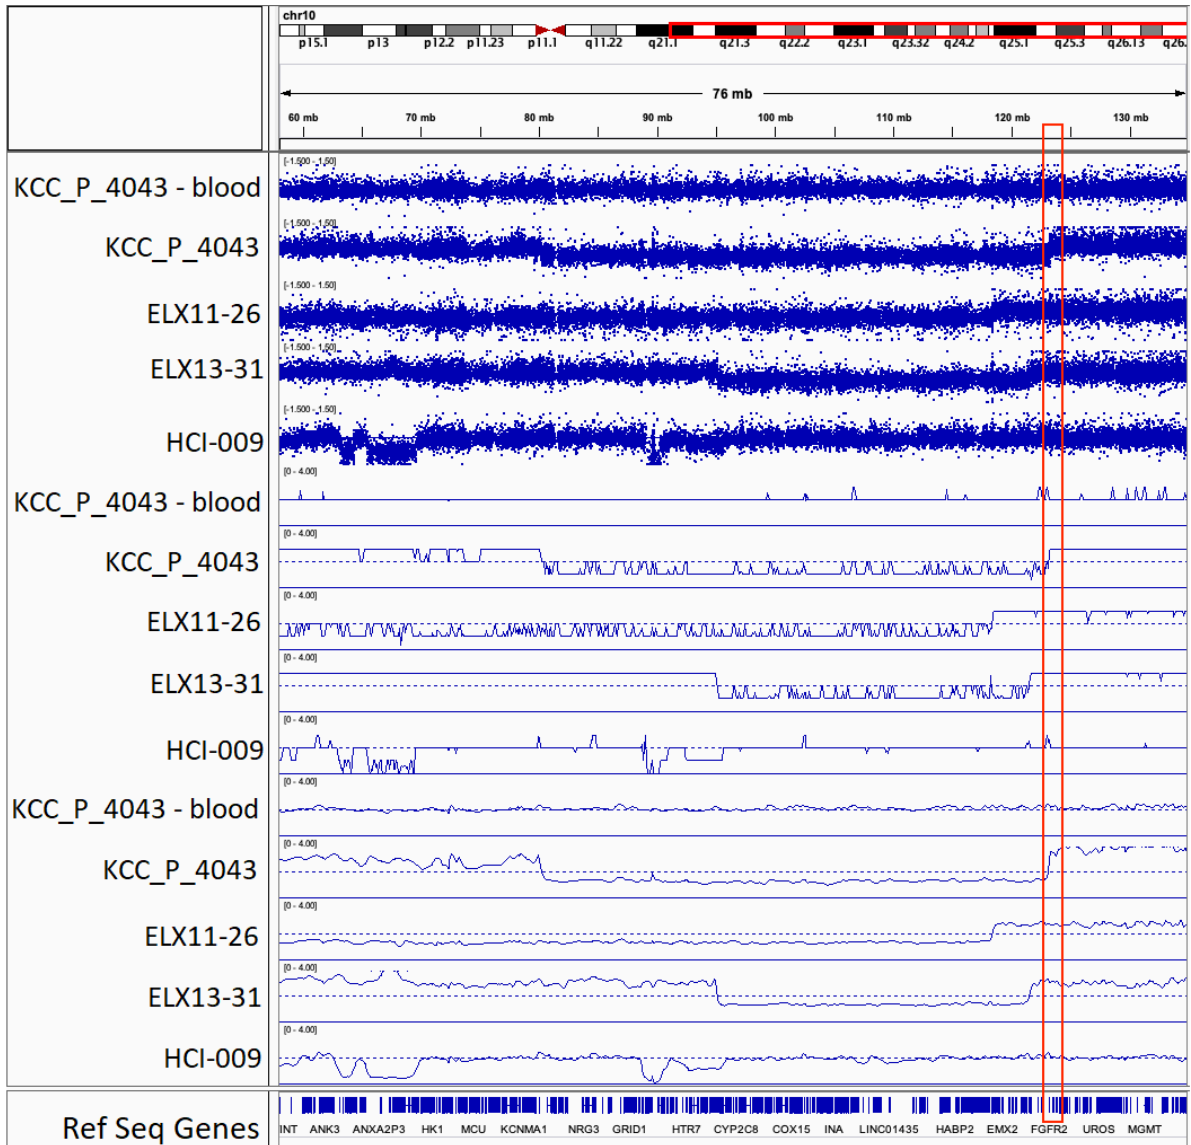

# Supplementary Figure 6

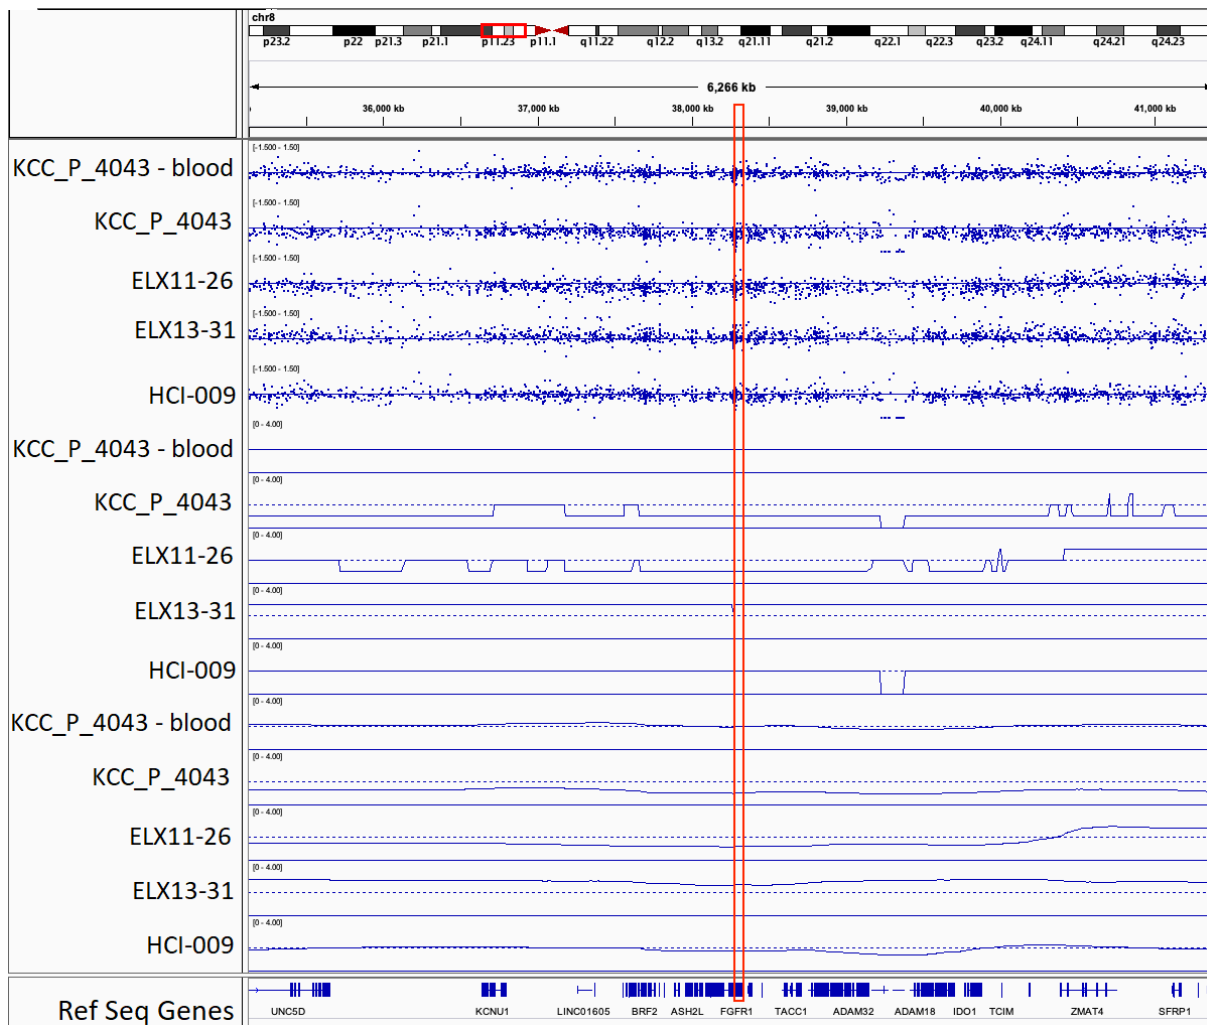

# Supplementary Figure 7

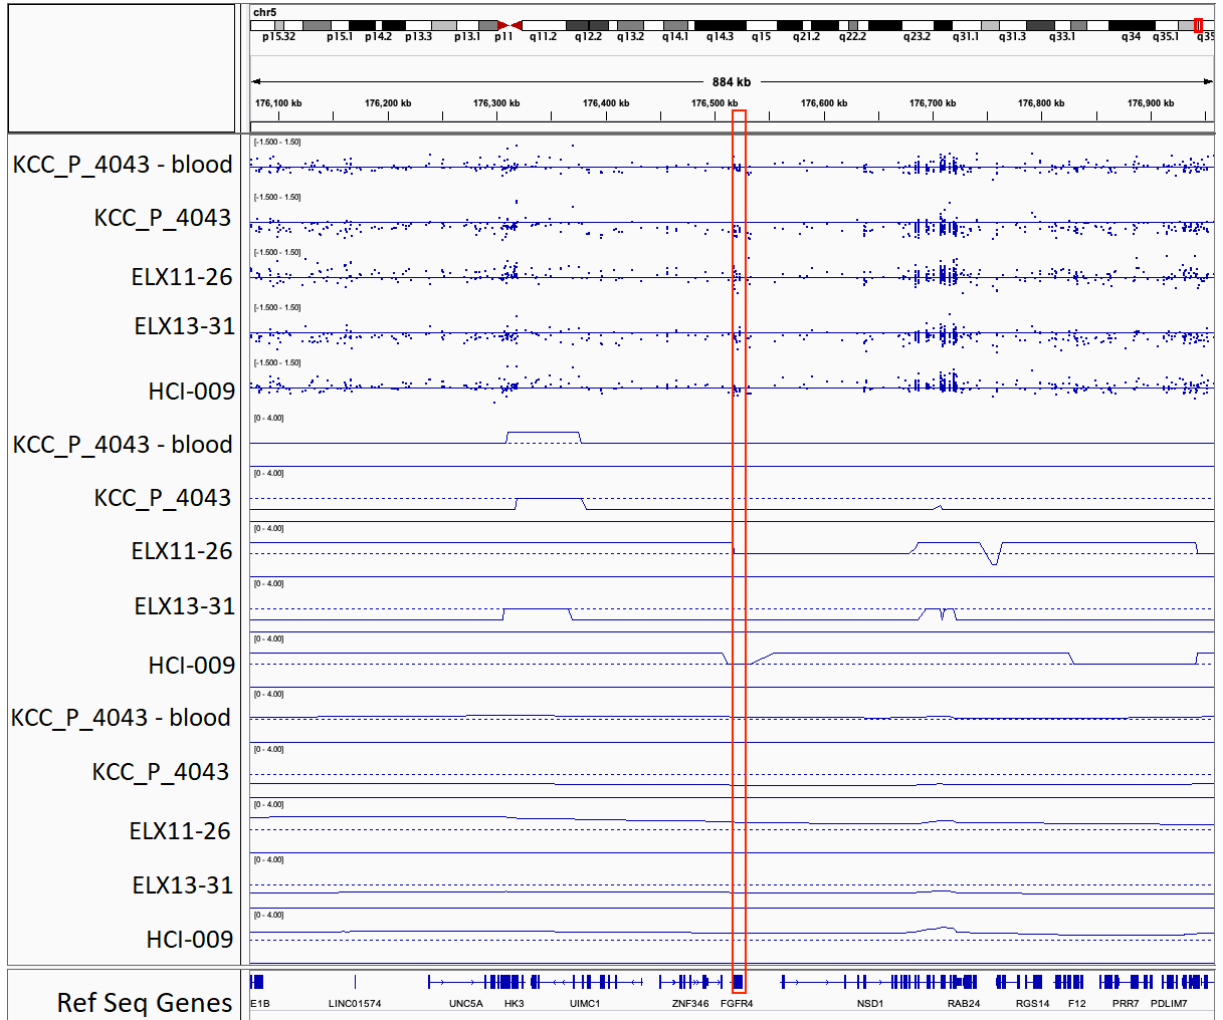

# Supplementary Figure 8

**A**

**TCGA Dataset - (n=126/994)**

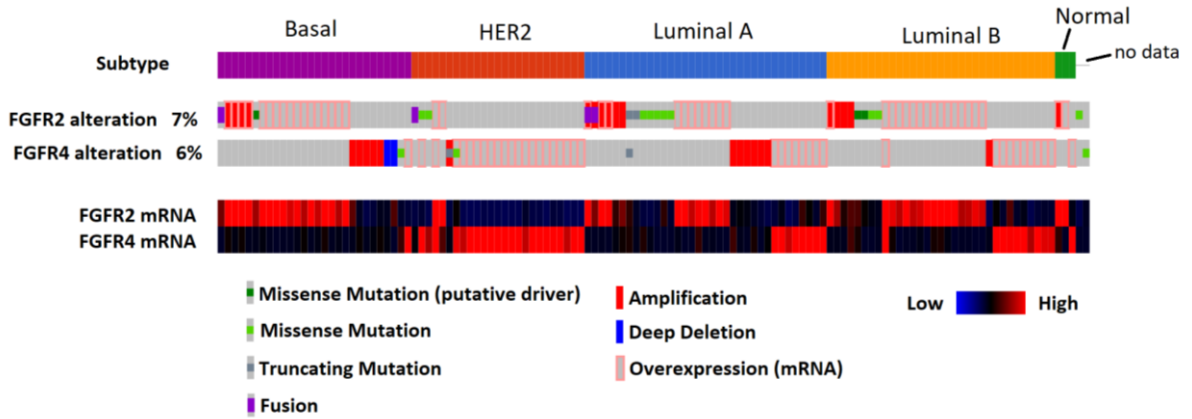

**B**

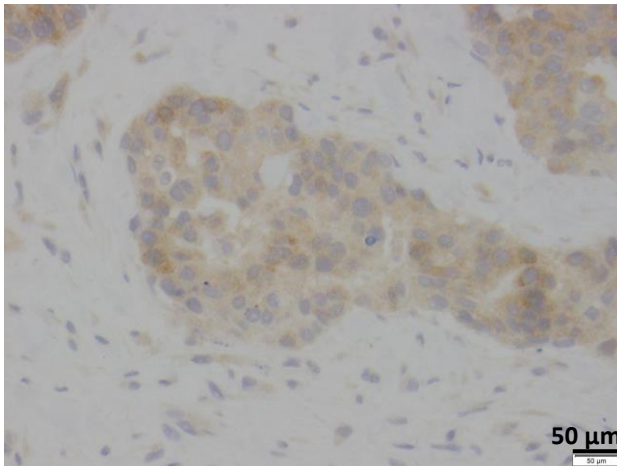

**C**

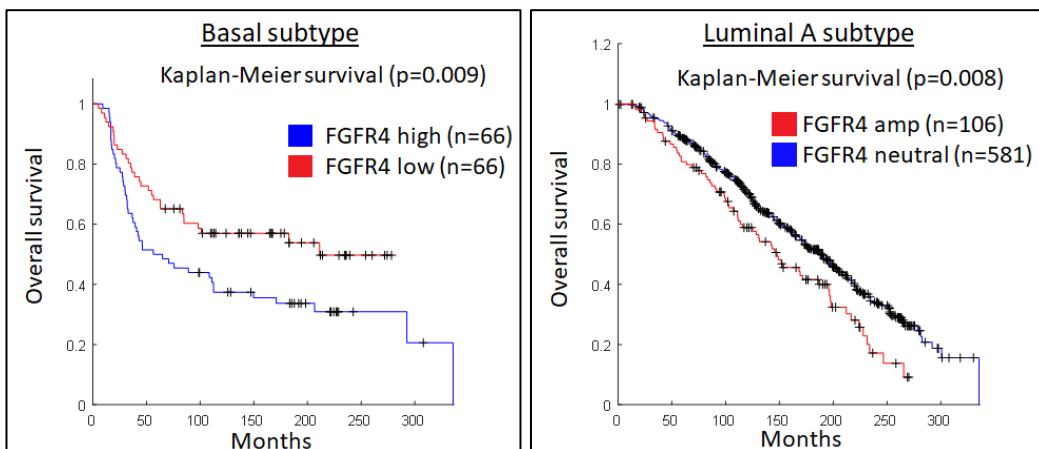

Supplement: MOESM4 [file 19538164]
