# Supplementary material for: Evaluation of FGFR targeting in breast cancer through interrogation of patient-derived models
Source: Springer Nature journal article supplement (doi:10.1186/s13058-021-01461-4), 2021-08-03

Low phosphorylation

0.0

High phosphorylation

-5.0

5.0

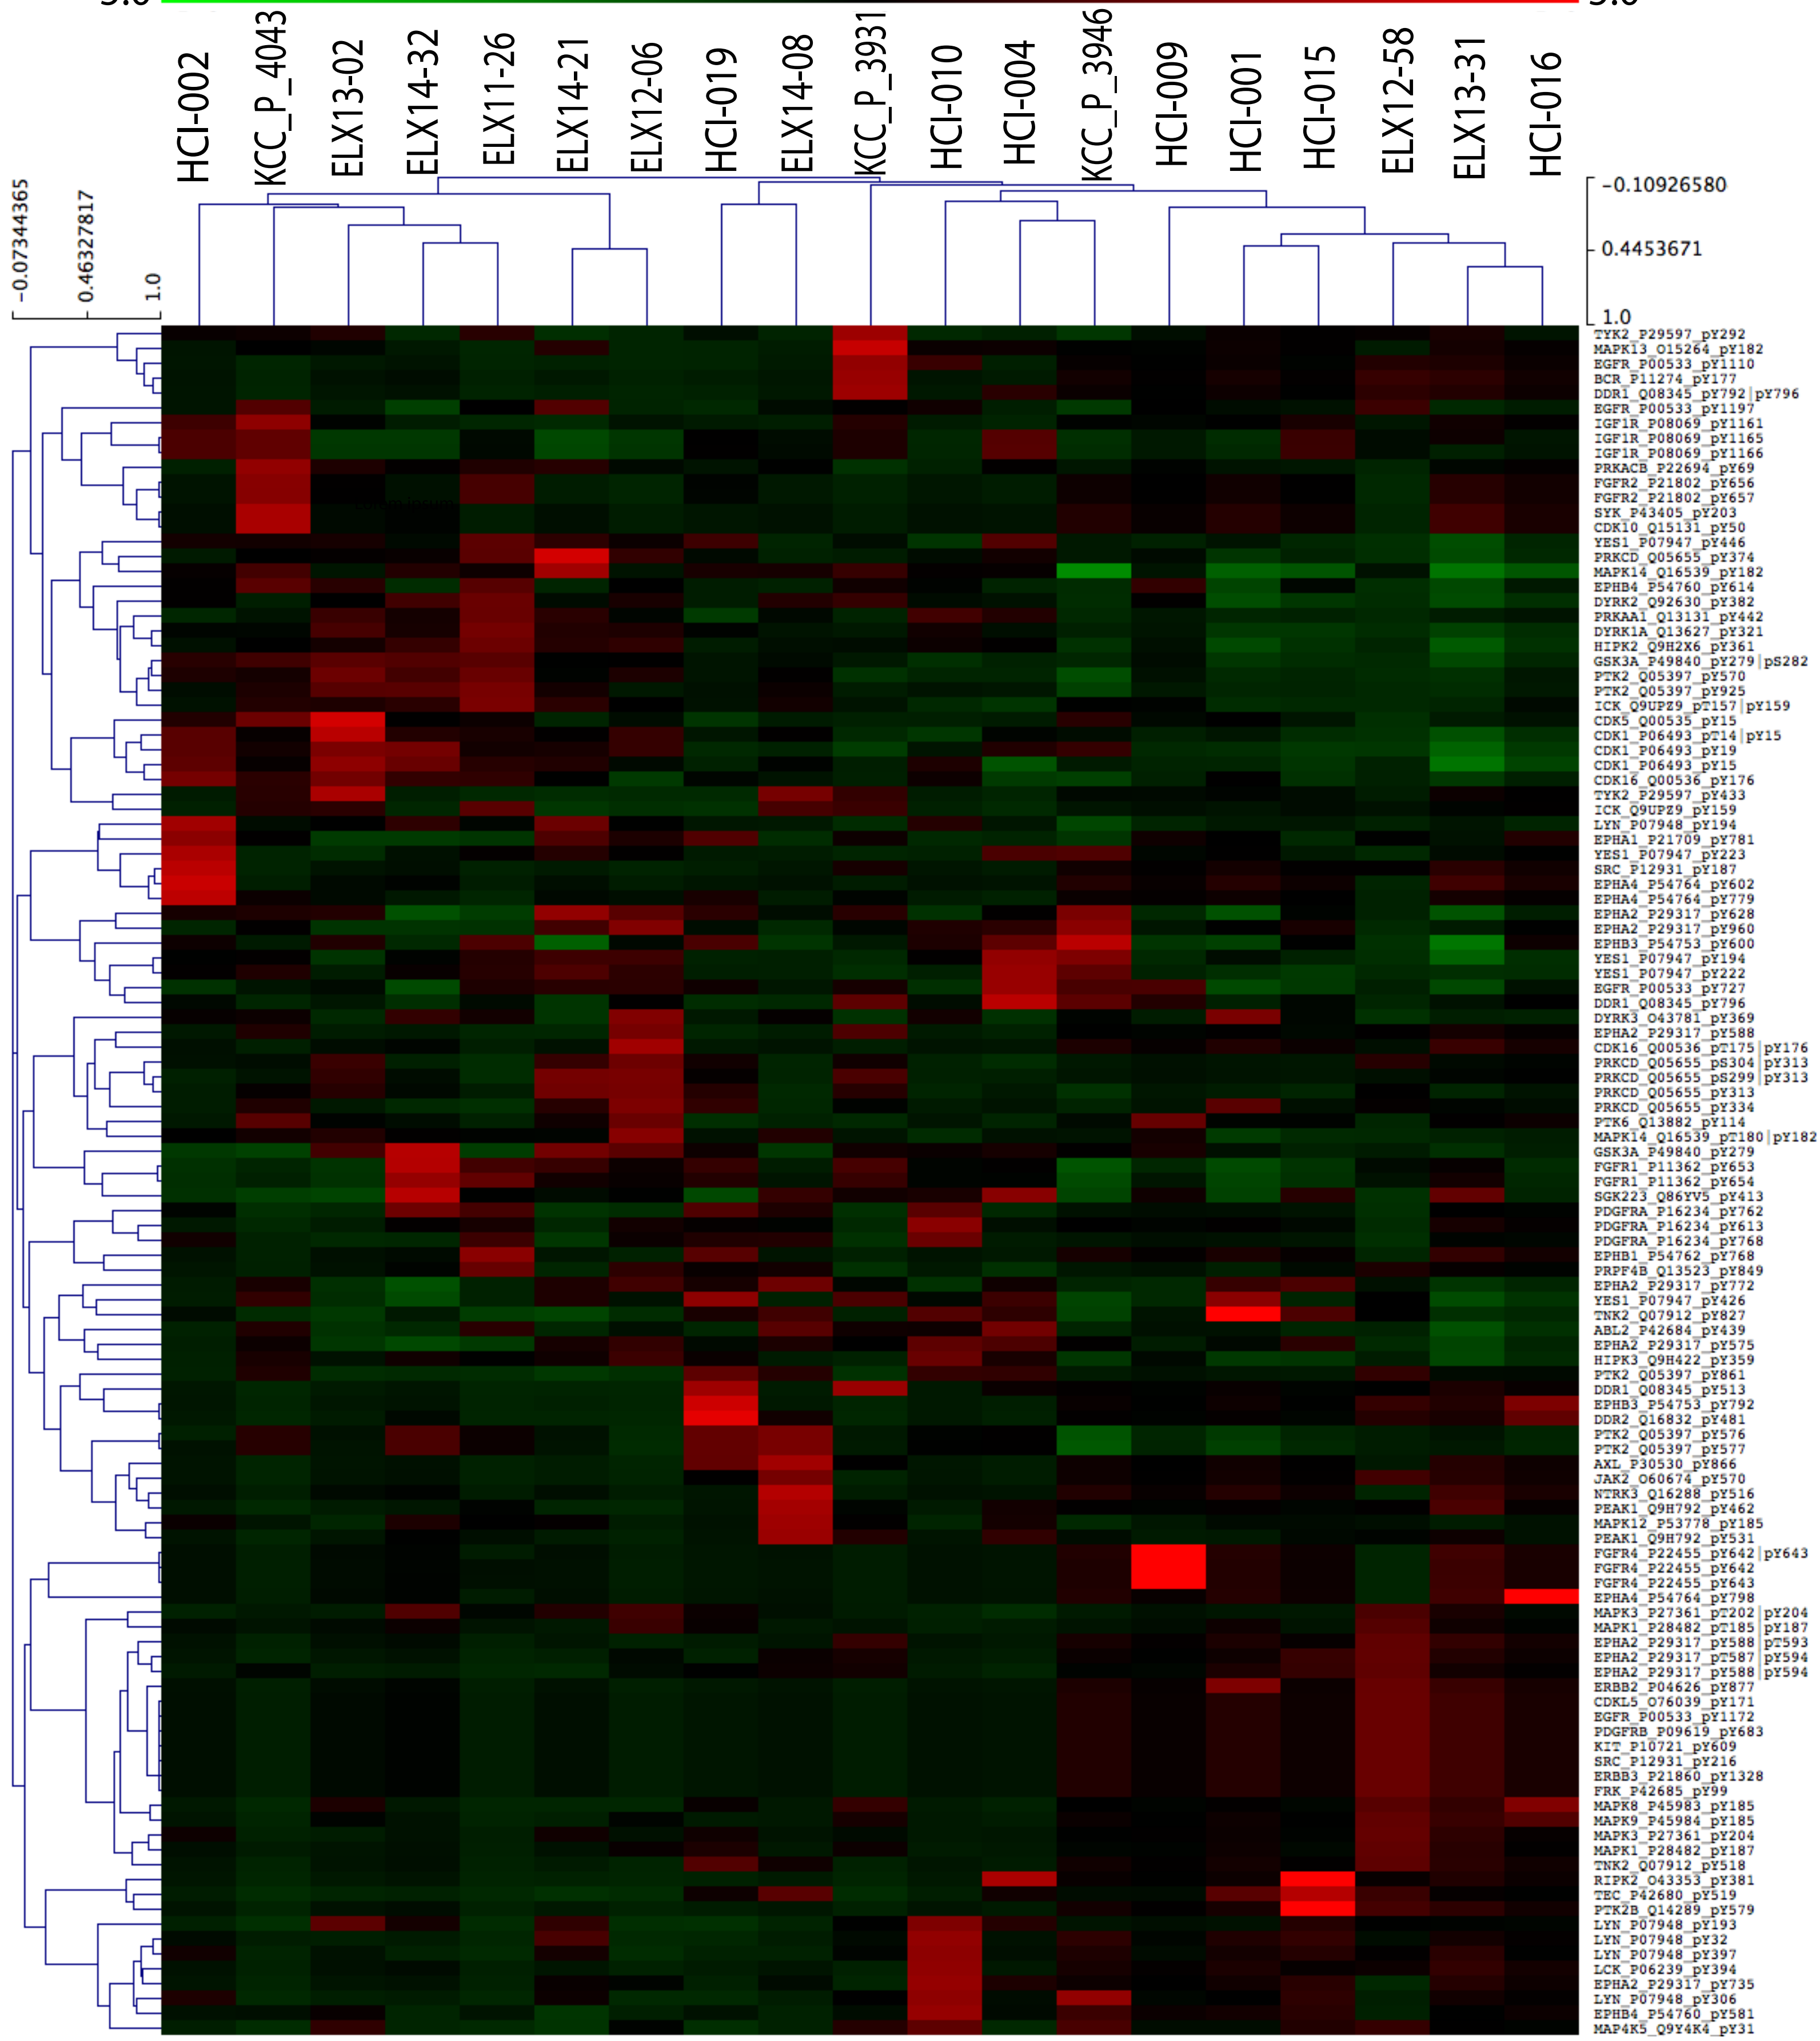

Supplement: MOESM1 [file 19538164]
