# Supplementary material for: Evaluation of FGFR targeting in breast cancer through interrogation of patient-derived models
Source: Springer Nature journal article supplement (doi:10.1186/s13058-021-01461-4), 2021-08-03
Supplement: MOESM3 [file 19538164]

### HCI-001

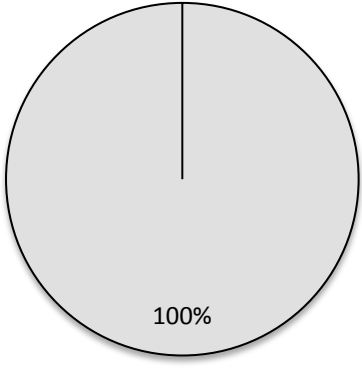

□ TNK2(pY518,pY827)

### HCI-002

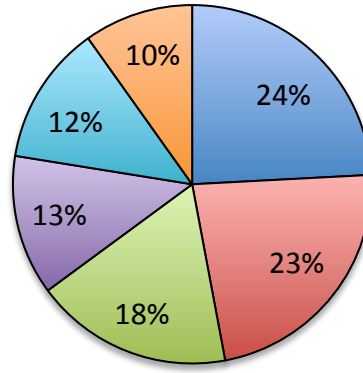

■ EPHA4(pY602,pY779,pY798)  
 ■ SRC(pY187,pY216)  
 ■ EPHA1(pY781)  
 ■ CDK1(pT14|pY15,pY15,pY19)  
 ■ CDK16(pT175|pY176,pY176)  
 ■ IGF1R(pY1161,pY1165,pY1166)

### HCI-009

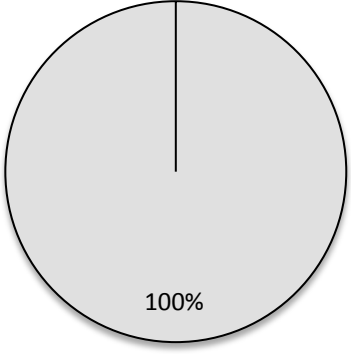

□ FGFR4(pY642,pY642|pY643,pY643)

### HCI-010

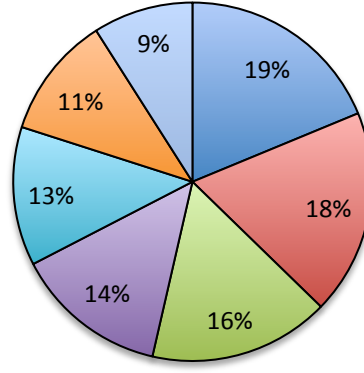

■ LCK(pY394)  
 ■ LYN(pY193,pY194,pY306,pY32,pY39)  
 ■ PDGFRA(pY613,pY762,pY768)  
 ■ HIPK3(pY359)  
 ■ MAP4K5(pY31)  
 ■ TNK2(pY518,pY827)  
 ■ PRKAA1(pY442)

### HCI-015

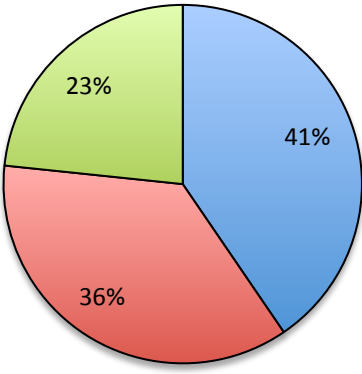

■ PTK2B(pY579)  
 ■ RIPK2(pY381)  
 ■ TEC(pY519)

### ELX12-58

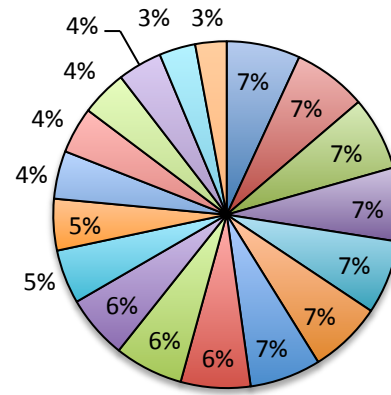

■ ERBB3(pY1328)  
 ■ FRK(pY99)  
 ■ CDKL5(pY171)  
 ■ KIT(pY609)  
 ■ PDGFRB(pY683)  
 ■ ERBB2(pY877)  
 ■ MAPK3(pT202|pY204,pY204)  
 ■ MAPK9(pY185)  
 ■ MAPK1(pT185|pY187,pY187)  
 ■ MAPK8(pY185)  
 ■ PTK2B(pY579)  
 ■ JAK2(pY570)  
 ■ TEC(pY519)  
 ■ EGFR(pY1110,pY1172,pY1197,pY727)  
 ■ BCR(pY177)  
 ■ MAP4K5(pY31)  
 ■ DDR2(pY481)  
 ■ PRPF4B(pY849)

### HCI-004

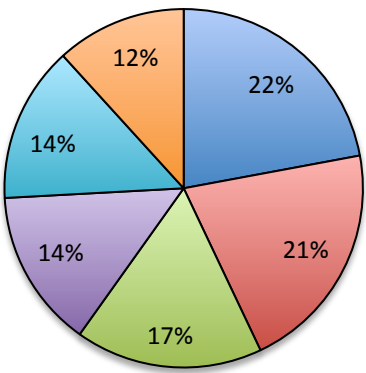

■ DDR1(pY513,pY792|pY796,pY796)  
 ■ RIPK2(pY381)  
 ■ SGK223(pY413)  
 ■ ABL2(pY439)  
 ■ YES1(pY194,pY222,pY223,pY426,pY446)  
 ■ EPHB3(pY600,pY792)

### KCC\_P\_3931

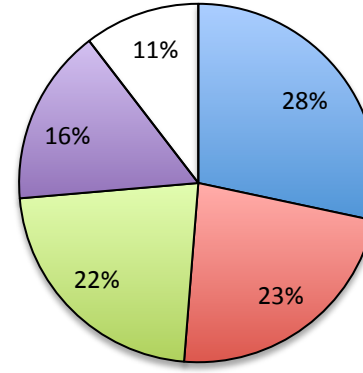

■ MAPK13(pY182)  
 ■ TYK2(pY292,pY433)  
 ■ BCR(pY177)  
 ■ DDR1(pY513,pY792|pY796,pY796)  
 ■ FGFR1(pY653,pY654)

### HCI-019

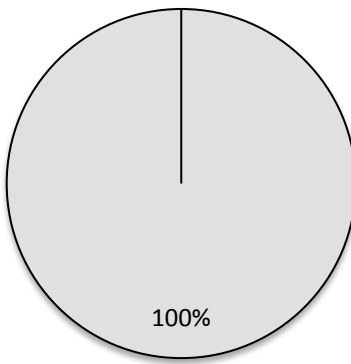

□ DDR2(pY481)

### ELX 14-08

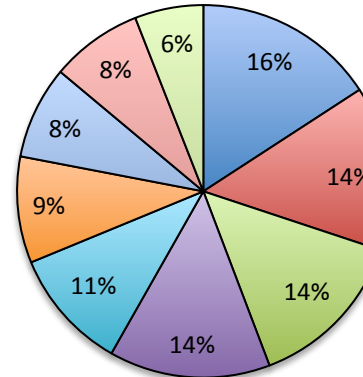

■ NTRK3(pY516)  
 ■ AXL(pY866)  
 ■ MAPK12(pY185)  
 ■ PEAK1(pY462,pY531)  
 ■ JAK2(pY570)  
 ■ PTK2(pY570,pY576,pY577,pY861,pY925)  
 ■ TEC(pY519)  
 ■ ABL2(pY439)  
 ■ TNK2(pY518,pY827)

### ELX 11-26

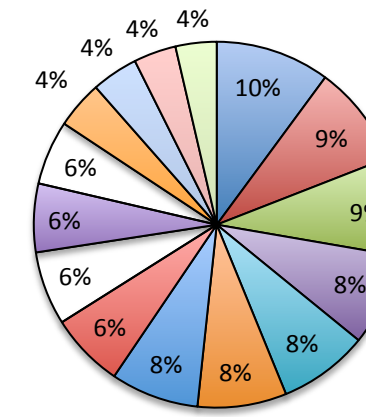

■ EPHB1(pY768)  
 ■ ICK(pT157|pY159,pY159)  
 ■ DYRK1A(pY321)  
 ■ HIPK2(pY361)  
 ■ DYRK2(pY382)  
 ■ PRKAA1(pY442)  
 ■ PRPF4B(pY849)  
 ■ EPHB4(pY581,pY614)  
 ■ FGFR1(pY653,pY654)  
 ■ EPHB3(pY600,pY792)  
 ■ FGFR2(pY656,pY657)  
 ■ PDGFRA(pY613,pY762,pY768)  
 ■ PTK2(pY570,pY576,pY577,pY861,pY925)  
 ■ ABL2(pY439)  
 ■ CDK1(pT14|pY15,pY15,pY19)

### KCC\_P\_4043

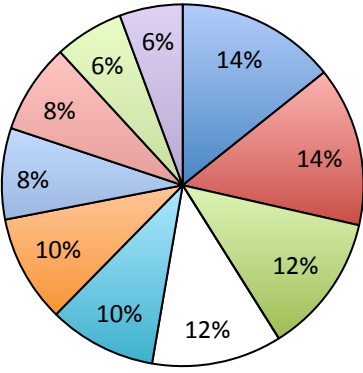

■ SYK(pY203)  
 ■ CDK10(pY50)  
 ■ PRKACB(pY69)  
 ■ FGFR2(pY656,pY657)  
 ■ IGF1R(pY1161,pY1165,pY1166)  
 ■ CDK5(pY15)  
 ■ EPHB4(pY581,pY614)  
 ■ PTK6(pY114)  
 ■ EGFR(pY1110,pY1172,pY1197,pY727)  
 ■ MAPK14(pT180|pY182,pY182)

### ELX14-32

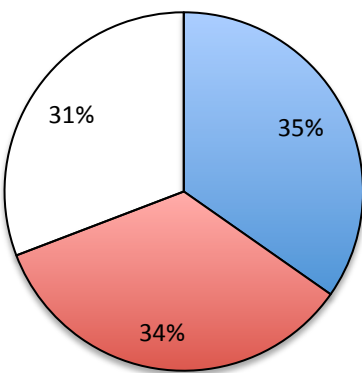

■ SGK223(pY413)  
 ■ GSK3A(pY279,pY279|pS282)  
 ■ FGFR1(pY653,pY654)

### ELX13-02

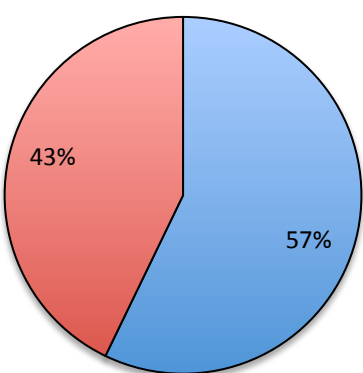

■ CDK5(pY15)  
 ■ CDK1(pT14|pY15,pY15,pY19)

### ELX12-06

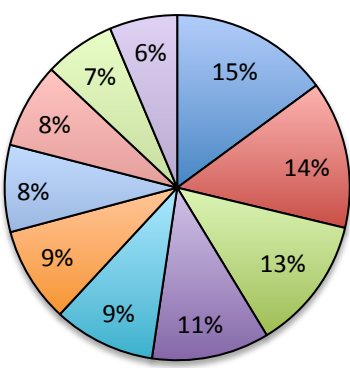

■ DYRK3(pY369)  
 ■ PRKCD(pS299|pY313,pS304|pY313,pY313,pY334,pY374)  
 ■ PTK6(pY114)  
 ■ GSK3A(pY279,pY279|pS282)  
 ■ MAPK14(pT180|pY182,pY182)  
 ■ EPHA2(pY575,pT587|pY594,pY588,pY588|pT593,pY588|pY594,pY628,pY735,pY772,pY960)  
 ■ CDK16(pT175|pY176,pY176)  
 ■ HIPK3(pY359)  
 ■ HIPK2(pY361)  
 ■ PRPF4B(pY849)
